# Supplementary material
Source: PubMed Central journal article supplement (PMC6761757)
Supplement: ao9b02127_si_001.pdf [file ao9b02127_si_001.pdf]

# Chemical genomic profiling unveils the *in vitro* and *in vivo* antiplasmodial mechanism of açai (*Euterpe oleracea* Mart.) polyphenols

*Letícia T. Ferreira*<sup>†,#</sup>, *Vinicius P. Venancio*<sup>‡,#</sup>, *Taila Kawano*<sup>‡,§</sup>, *Lailah C. C. Abrão*<sup>‡,§</sup>, *Tatyana A. Tavella*<sup>†</sup>, *Ludimila D. Almeida*<sup>⊥</sup>, *Gabriel S. Pires*<sup>⊥</sup>, *Elizabeth Bilsland*<sup>⊥</sup>, *Per Sunnerhagen*<sup>||</sup>, *Luciana Azevedo*<sup>∇</sup>, *Stephen T. Talcott*<sup>‡</sup>, *Susanne U. Mertens-Talcott*<sup>‡,\*</sup>, *Fabio T. M. Costa*<sup>†,\*</sup>

<sup>†</sup> Laboratory of Tropical Diseases – Prof. Dr. Luiz Jacintho da Silva, Department of Genetics, Evolution, Microbiology and Immunology, University of Campinas – UNICAMP. Campinas, SP, Brazil.

<sup>‡</sup> Department of Nutrition and Food Science, Texas A&M University, College Station, TX, USA.

<sup>§</sup> Laboratory of Toxicant and Drug Analyses, Federal University of Alfenas, Alfenas, MG, Brazil.

<sup>⊥</sup> Synthetic Biology Laboratory, Department of Structural and Functional Biology, Institute of Biology, UNICAMP, Campinas, SP, Brazil.

<sup>||</sup> Department of Chemistry and Molecular Biology, University of Gothenburg, Gothenburg, Sweden.

<sup>∇</sup> Faculty of Nutrition, Federal University of Alfenas, Alfenas, MG, Brazil.

Table S1 – Sensitive mutant yeast strains depleted under total phenolics (1) treatment.

| ORF       | Gene    | Protein ID | log2FoldChange | TP pvalue | Process                                            |
|-----------|---------|------------|----------------|-----------|----------------------------------------------------|
| YBL069W   | AST1    | P35183     | -3,00989       | 0,009216  | protein transport                                  |
| YAR023C   | unknown | D6VPM8     | -2,25249       | 0,0006    | unknown                                            |
| YLL003W   | SFI1    | Q12369     | -2,06444       | 0,006149  | cell cycle progression                             |
| YAL017W   | PSK1    | P31374     | -2,04111       | 0,005236  | protein phosphorylation                            |
| YHL015W   | RPS20   | P38701     | -1,84055       | 0,008569  | RNA modification and translation                   |
| YML010W-A | unknown | Q6B0Y1     | -1,83123       | 0,001358  | unknown                                            |
| YMR018W   | PEX9    | Q04364     | -1,81627       | 0,000698  | protein import for peroxisome                      |
| YCR017C   | CWH43   | P25618     | -1,73376       | 0,000595  | cell wall assembly/GPI biosynthesis                |
| YCL058C   | FYV5    | P25585     | -1,57698       | 0,002022  | signaling                                          |
| YMR204C   | INP1    | Q03694     | -1,57039       | 0,003732  | peroxisome inheritance                             |
| YMR230W   | RPS10B  | P46784     | -1,53678       | 0,001565  | RNA export and translation                         |
| YGL157W   | ARI1    | P53111     | -1,50278       | 7,94E-05  | oxireduction                                       |
| YHL023C   | NPR3    | P38742     | -1,4926        | 0,00037   | signaling                                          |
| YFL049W   | SWP82   | P43554     | -1,46713       | 0,009164  | transcription regulation                           |
| YMR271C   | URA10   | P30402     | -1,46672       | 0,002199  | ribonucleotides biosynthesis                       |
| YER044C   | ERG28   | P40030     | -1,46511       | 0,001549  | lipid metabolism                                   |
| YER071C   | TDA2    | P40045     | -1,38          | 0,001858  | cytoskeleton organization                          |
| YER036C*  | ARB1    | P40024     | -1,36015       | 0,009498  | ribosome biogenesis and transport                  |
| YLR428C   | unknown | O13564     | -1,35653       | 0,000926  | unknown                                            |
| YMR207C   | HFA1    | P32874     | -1,3407        | 0,002794  | lipid metabolism                                   |
| YCR053W   | THR4    | P16120     | -1,31124       | 0,003309  | AA biosynthesis                                    |
| YNR013C   | PHO91   | P27514     | -1,3081        | 0,004094  | ion transport                                      |
| YBL035C   | POL12   | P38121     | -1,30419       | 0,004748  | DNA replication                                    |
| YOL150C   | unknown | Q08293     | -1,30041       | 0,001477  | unknown                                            |
| YPR119W   | CLB2    | P24869     | -1,30011       | 0,002362  | protein phosphorylation/cell cycle                 |
| YIL053W   | GPP1    | P41277     | -1,23148       | 0,005322  | response to osmotic stress                         |
| YCR024C-A | PMP1    | P32903     | -1,21954       | 0,004522  | ion transport                                      |
| YKR050W   | TRK2    | P28584     | -1,20432       | 0,000486  | ion transport                                      |
| YFL031W   | HAC1    | P41546     | -1,19712       | 0,001506  | unfolded protein response/transcription regulation |
| YPR167C   | MET16   | P18408     | -1,13406       | 0,005196  | oxireduction                                       |
| YKR018C   | unknown | P36114     | -1,13193       | 0,007639  | unknown                                            |
| YOR132W   | VPS17   | P32913     | -1,09145       | 0,006946  | vesicle transport                                  |
| YER097W   | unknown | P40062     | -1,03611       | 0,008503  | unknown                                            |
| YPR075C   | OPY2    | Q06810     | -1,03551       | 0,001841  | signaling                                          |
| YPL006W   | NCR1    | Q12200     | -1,03369       | 0,004371  | lipid metabolism                                   |
| YCR032W   | BPH1    | P25356     | -1,02783       | 0,004942  | cell wall organization                             |
| YCL035C   | GRX1    | P25373     | -1,02432       | 0,006681  | response to oxidative stress                       |
| YGL252C   | RTG2    | P32608     | -1,01761       | 0,003385  | transcription regulation                           |
| YCR052W   | RSC6    | P25632     | -0,99924       | 0,00826   | transcription regulation                           |
| YHR016C   | YSC84   | P32793     | -0,99431       | 0,006581  | cytoskeleton organization                          |
| YFL004W   | VTC2    | P43585     | -0,98317       | 0,001928  | vacuolar transport                                 |

|         |         |        |          |          |                      |
|---------|---------|--------|----------|----------|----------------------|
| YBR103W | SIF2    | P38262 | -0,97773 | 0,009337 | signaling            |
| YNL022C | RCM1    | P53972 | -0,97595 | 0,007339 | RNA modification     |
| YOL141W | PPM2    | Q08282 | -0,96816 | 0,007268 | RNA modification     |
| YJL171C | unknown | P46992 | -0,96689 | 0,007395 | unknown              |
| YER092W | IES5    | P40060 | -0,96485 | 0,004248 | telomere maintenance |
| YKR041W | unknown | P36134 | -0,92104 | 0,002953 | unknown              |
| YFR014C | CMK1    | P27466 | -0,87737 | 0,005333 | signaling            |
| YPR189W | SKI3    | P17883 | -0,85451 | 0,009877 | RNA degradation      |
| YIL023C | YKE4    | P40544 | -0,85284 | 0,00611  | ion transport        |
| YLL009C | COX17   | Q12287 | 1,29817  | 0,000727 | aerobic respiration  |

ORFs marked with \* represent essential genes

Table S2 – Sensitive mutant yeast strains depleted under non-anthocyanin phenolics (2) treatment.

| ORF       | Gene    | Protein ID | log2FoldChange | NAP      |  | Gene ontology                                      |
|-----------|---------|------------|----------------|----------|--|----------------------------------------------------|
|           |         |            |                | pvalue   |  |                                                    |
| YMR044W   | IOC4    | Q04213     | -2,50373       | 1,75E-05 |  | chromatin organization                             |
| YCR059C   | YIH1    | P25637     | -1,29308       | 1,86E-05 |  | protein phosphorylation                            |
| YAL053W   | FLC2    | P39719     | -1,55199       | 6,25E-05 |  | lipid metabolism                                   |
| YCR065W   | HCM1    | P25364     | -1,00563       | 0,0001   |  | transcription regulation                           |
| YCR051W   | unknown | P25631     | -1,05881       | 0,000125 |  | unknown                                            |
| YCR049C   | unknown | P25629     | -1,22856       | 0,000137 |  | unknown                                            |
| YLR025W   | SNF7    | P39929     | 1,158644       | 0,00015  |  | protein degradation                                |
| YAR028W   | unknown | P39548     | -1,78479       | 0,000208 |  | unknown                                            |
| YOR374W   | ALD4    | P46367     | -1,09686       | 0,000238 |  | monocarboxylic acid metabolism                     |
| YMR207C   | HFA1    | P32874     | -1,42527       | 0,000277 |  | lipid metabolism                                   |
| YFR014C   | CMK1    | P27466     | -1,07409       | 0,000278 |  | signaling                                          |
| YCR082W   | AHC2    | P25649     | -1,37753       | 0,000306 |  | histone acetylation                                |
| YCR002C   | CDC10   | P25342     | -1,69566       | 0,000362 |  | cell cycle                                         |
| YDR068W   | unknown | P54858     | 1,287375       | 0,000399 |  | unknown                                            |
| YFL027C   | GYP8    | P43570     | -1,31164       | 0,000581 |  | vesicle transport                                  |
| YMR218C*  | TRS130  | Q03660     | -1,50952       | 0,000601 |  | endosomal transport                                |
| YMR084W   | unknown | A2P2R3     | -1,0953        | 0,000853 |  | unknown                                            |
| YBR219C   | unknown | P38317     | -1,25534       | 0,001255 |  | unknown                                            |
| YHR009C   | TDA3    | P38758     | -1,38673       | 0,00133  |  | endosomal transport                                |
| YNL140C   | unknown | P53910     | -1,16283       | 0,001589 |  | unknown                                            |
| YER007C-A | VID28   | P89886     | -1,43867       | 0,001647 |  | ribosome biogenesis                                |
| YEL026W   | SNU13   | P39990     | -1,1394        | 0,001671 |  | RNA modification                                   |
| YFL031W   | HAC1    | P41546     | -1,03349       | 0,001869 |  | unfolded protein response/transcription regulation |
| YKL157W   | APE2    | P32454     | -0,82714       | 0,001935 |  | peptide catabolism                                 |
| YMR144W   | FDO1    | P40214     | -1,61338       | 0,00198  |  | yeast mating                                       |
| YJL007C   | unknown | P47080     | -1,00179       | 0,002297 |  | unknown                                            |
| YIL154C   | IMP2'   | P32351     | -0,83364       | 0,002327 |  | transcription regulation                           |
| YBR057C   | MUM2    | P38236     | -1,03262       | 0,0024   |  | cell cycle/DNA replication                         |
| YAR003W   | SWD1    | P39706     | -1,52401       | 0,002615 |  | chromatin organization                             |
| YJR064W*  | CCT5    | P40413     | -1,27372       | 0,0028   |  | protein folding                                    |
| YIL142W*  | CCT2    | P39076     | -2,02489       | 0,002921 |  | protein folding                                    |
| YDR219C   | MFB1    | Q04922     | -0,96579       | 0,003298 |  | protein degradation                                |
| YKL164C   | PIR1    | Q03178     | -1,00759       | 0,003518 |  | cell wall organization/protein transport           |
| YIL009C-A | EST3    | Q03096     | -1,3971        | 0,003632 |  | telomere maintenance                               |
| YKR050W   | TRK2    | P28584     | -0,81496       | 0,003718 |  | ion transport                                      |
| YIR018W   | YAP5    | P40574     | -0,90611       | 0,004499 |  | transcription regulation                           |
| YER121W   | unknown | P40076     | -0,99279       | 0,004655 |  | unknown                                            |
| YKR018C   | unknown | P36114     | -1,18662       | 0,004849 |  | unknown                                            |
| YDR390C*  | UBA2    | P52488     | -1,19621       | 0,004944 |  | protein sumoylation                                |
| YIL141W   | unknown | P40461     | -1,01421       | 0,005015 |  | unknown                                            |
| YJL172W   | CPS1    | P27614     | -0,83284       | 0,005113 |  | protein degradation                                |
| YMR026C   | PEX12   | Q04370     | -1,88709       | 0,005124 |  | protein import to peroxisome                       |

|          |         |        |          |          |                                                     |
|----------|---------|--------|----------|----------|-----------------------------------------------------|
| YGL218W  | unknown | P53084 | -0,79706 | 0,005292 | unknown                                             |
| YBR137W  | unknown | P38276 | -0,81766 | 0,005298 | unknown                                             |
| YNR057C  | BIO4    | P53630 | -1,95844 | 0,005492 | biotin biosynthesis                                 |
| YIL017C  | VID28   | P40547 | -0,91135 | 0,005495 | transcription regulation/protein degradation        |
| YJR116W  | unknown | P47153 | -1,37086 | 0,005773 | unknown                                             |
| YFR030W  | MET10   | P39692 | -0,71096 | 0,006122 | sulfate assimilation                                |
| YJL140W  | RPB4    | P20433 | -1,14835 | 0,006258 | transcription regulation                            |
| YCL035C  | GRX1    | P25373 | -0,97205 | 0,006305 | response to oxidative stress                        |
| YAL019W  | FUN30   | P31380 | -1,21014 | 0,006494 | chromatin organization                              |
| YJL182C  | unknown | P46986 | -0,84505 | 0,006506 | unknown                                             |
| YAR050W  | FLO1    | P32768 | -1,06777 | 0,006524 | response to oxidative stress                        |
| YCL004W* | PGS1    | P25578 | -1,06198 | 0,007057 | lipid metabolism                                    |
| YCR084C  | TUP1    | P16649 | -0,80358 | 0,007425 | transcription regulation                            |
| YFR035C  | unknown | P43608 | -0,91414 | 0,007469 | unknown                                             |
| YBR164C  | ARL1    | P38116 | -1,14691 | 0,007623 | vesicle transport                                   |
| YER087W  | AIM10   | P39965 | -1,0392  | 0,007903 | unknown                                             |
| YAL016W  | TPD3    | P31383 | -1,2793  | 0,007904 | cell cycle                                          |
| YNL239W  | LAP3    | Q01532 | -0,77652 | 0,008292 | transcription regulation                            |
| YML053C  | unknown | Q04978 | -1,15255 | 0,008355 | unknown                                             |
| YCR063W  | BUD31   | P25337 | -0,9003  | 0,008484 | cell cycle progression                              |
| YPR122W  | AXL1    | P40851 | -1,15161 | 0,008655 | mating/cell cycle                                   |
| YOR357C  | SNX3    | Q08826 | -0,9141  | 0,008685 | endosomal transport                                 |
| YHR033W  | unknown | P38690 | -1,03916 | 0,009233 | unknown                                             |
| YBR027C  | unknown | P38220 | -0,94287 | 0,009373 | unknown                                             |
| YER174C  | GRX4    | P32642 | -0,75323 | 0,009499 | response to oxidative stress/chromatin organization |

ORFs marked with \* represent essential genes
